# Supplementary figures and images for: Familial breast cancer and DNA repair genes: Insights into known and novel susceptibility genes from the GENESIS study, and implications for multigene panel testing
Source: PubMed Central journal article supplement — Int J Cancer. 2018 Nov 13;144(8):1962–74. doi: 10.1002/ijc.31921 (PMC6587727; doi:10.1002/ijc.31921), 2018-11-13

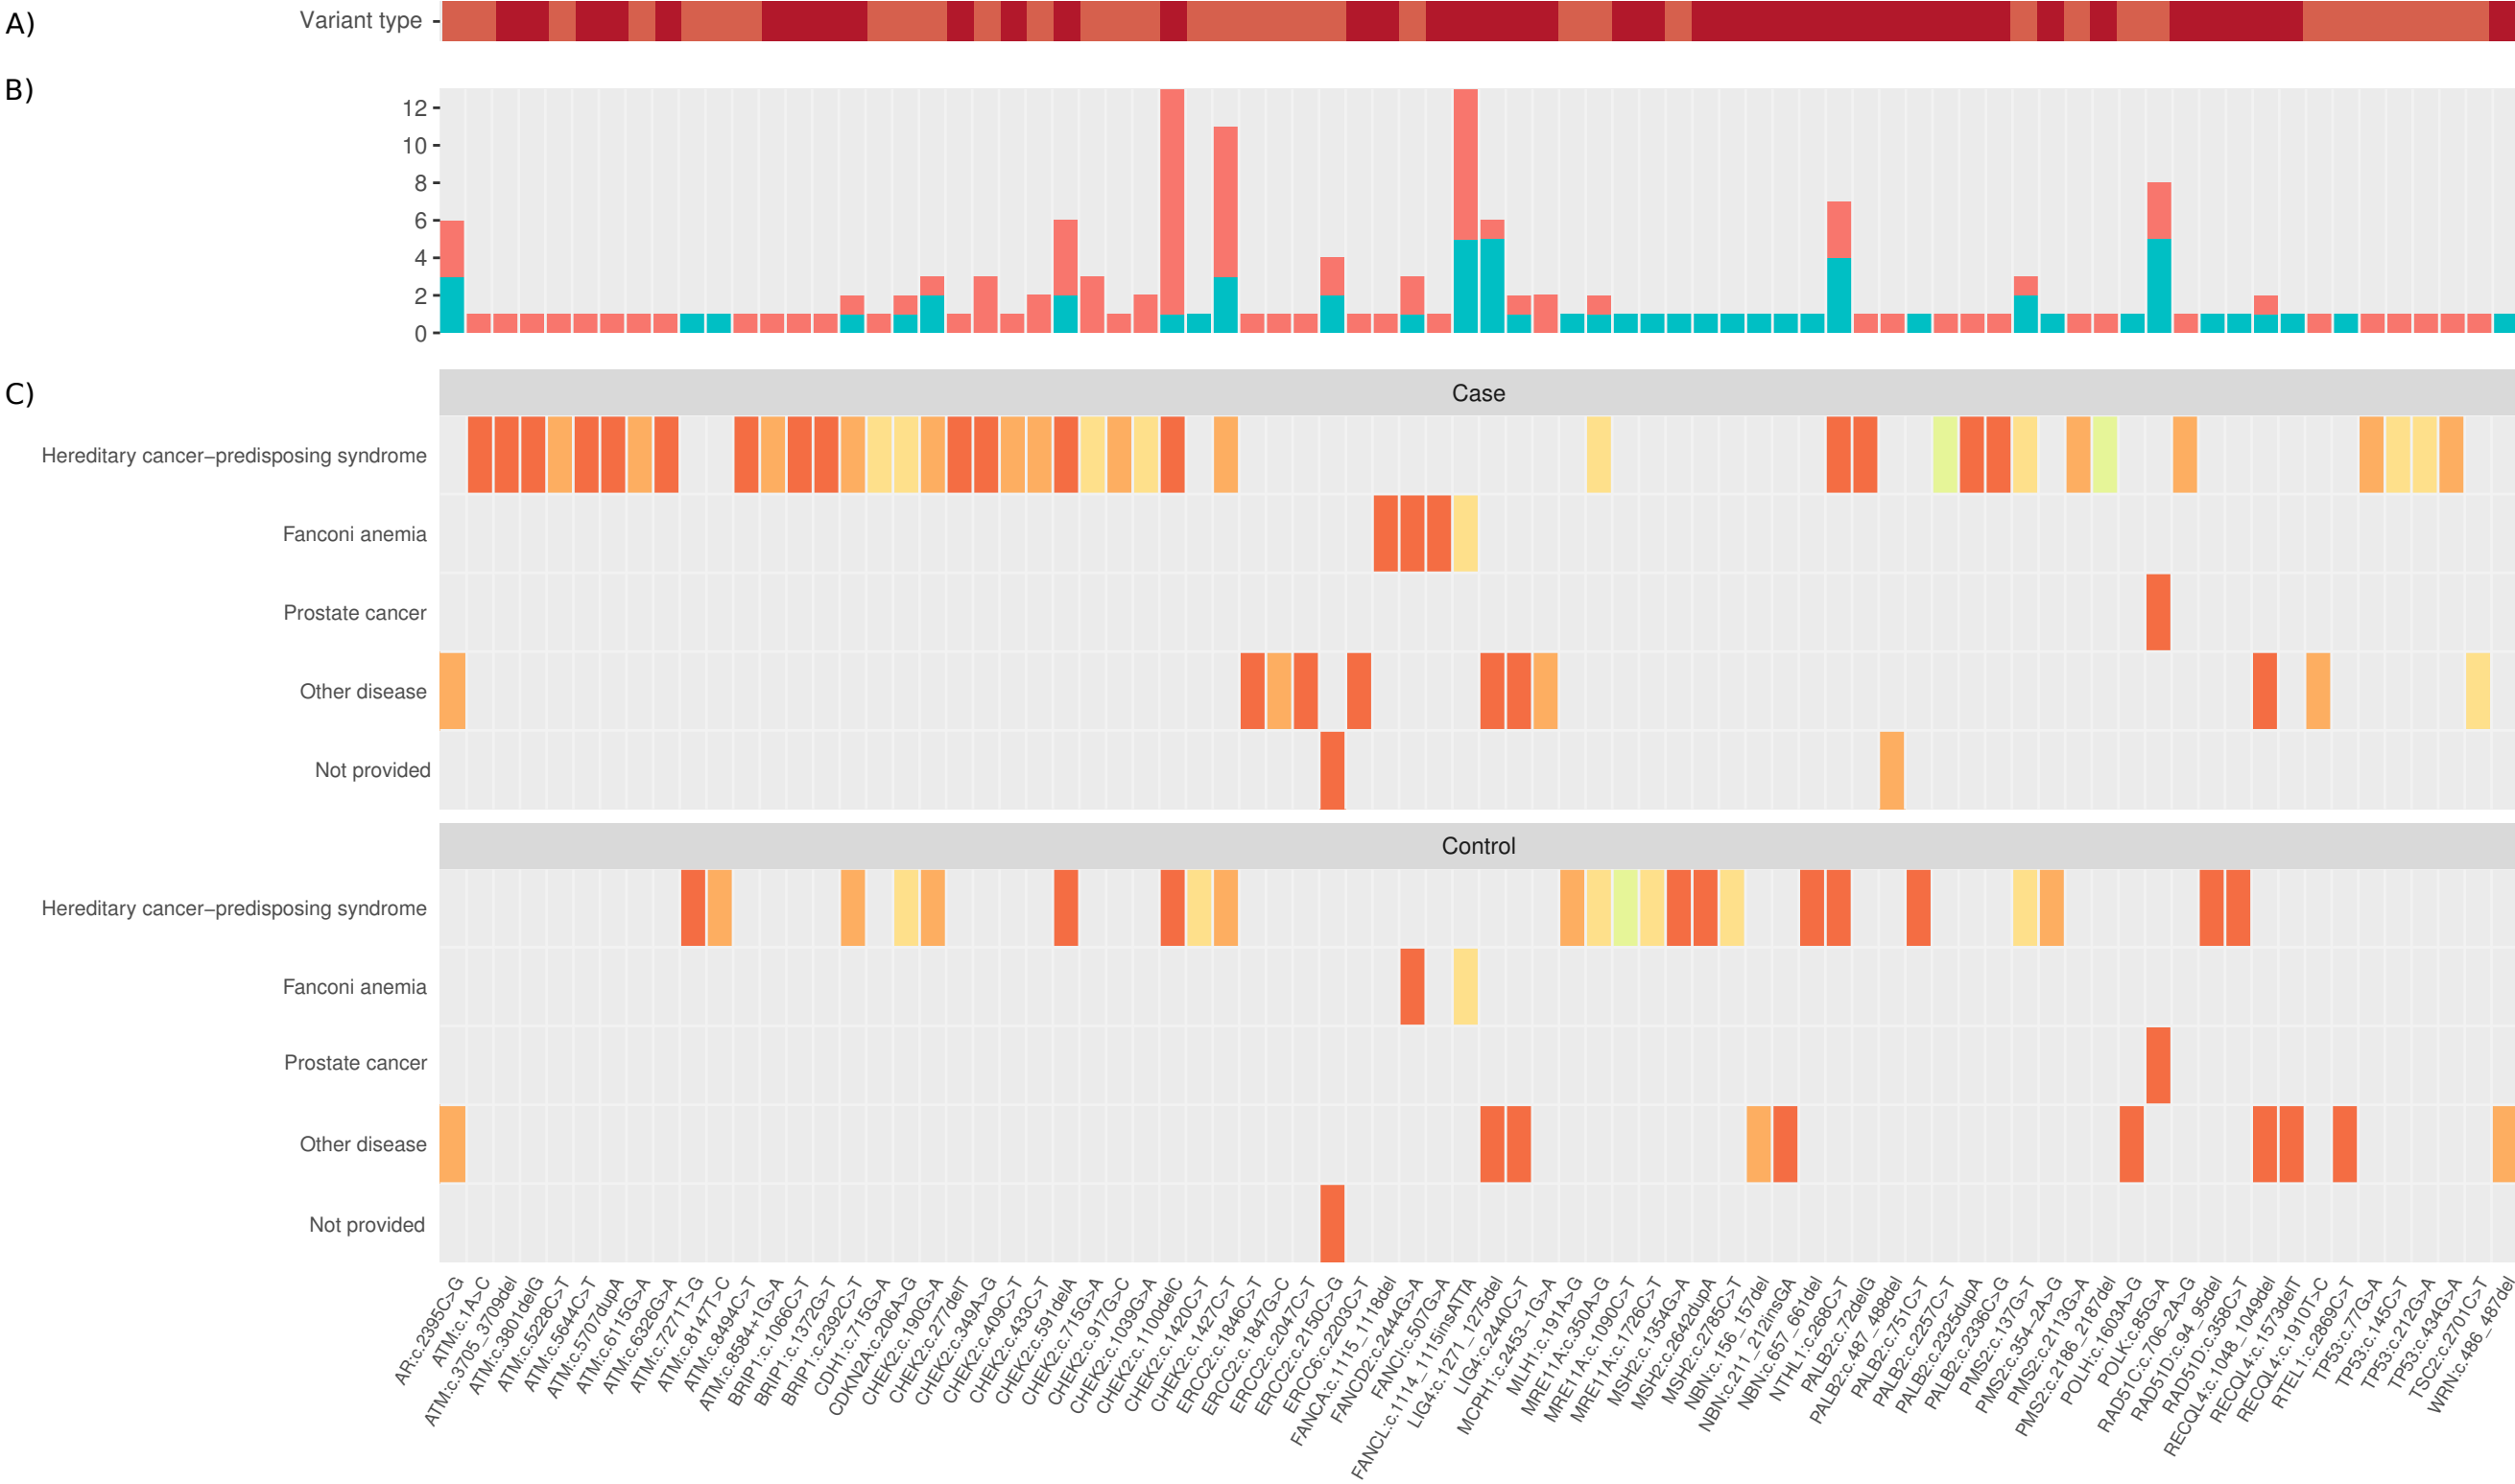

**A) Variant type**

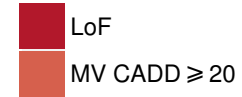

**B) Number of carriers**

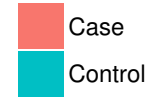

**C) ClinVar**

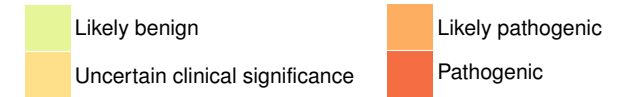

Supplement: IJC-144-1962-s006.pdf [file IJC-144-1962-s006.pdf]
